# Supplementary material
Source: PubMed Central journal article supplement (PMC3569963)
Supplement: Supp_Table3.pdf [file Supp_Table3.pdf]

SUPPLEMENTARY TABLE S3. RATES OF COLONY FORMATION OF PUTATIVE iPSCs FROM ENDANGERED FELIDS AT P4 BY 4-FACTOR INDUCTION AND 5-FACTOR INDUCTION

| <i>Species and experiment number</i> | <i>Infection efficiency (%)</i> | <i>4-Factor induction</i> |                                 | <i>5-Factor Induction</i> |                                 |
|--------------------------------------|---------------------------------|---------------------------|---------------------------------|---------------------------|---------------------------------|
|                                      |                                 | <i>Colonies (n)</i>       | <i>Reprogramming efficiency</i> | <i>Colonies (n)</i>       | <i>Reprogramming efficiency</i> |
| Bengal tiger                         |                                 |                           |                                 |                           |                                 |
| 1                                    | 90                              | 12                        | 0.00030                         | 22                        | 0.00055                         |
| 2                                    | 92                              | 14                        | 0.00035                         | 26                        | 0.00065                         |
| 3                                    | 92                              | 14                        | 0.00035                         | 25                        | 0.00062                         |
| Average                              |                                 |                           | 0.00033                         |                           | 0.00060                         |
| Jaguar                               |                                 |                           |                                 |                           |                                 |
| 1                                    | 91                              | 13                        | 0.00032                         | 21                        | 0.00052                         |
| 2                                    | 93                              | 13                        | 0.00032                         | 25                        | 0.00062                         |
| 3                                    | 93                              | 14                        | 0.00035                         | 25                        | 0.00062                         |
| Average                              |                                 |                           | 0.00033                         |                           | 0.00058                         |
| Serval                               |                                 |                           |                                 |                           |                                 |
| 1                                    | 99                              | 15                        | 0.00037                         | 24                        | 0.00060                         |
| 2                                    | 98                              | 14                        | 0.00035                         | 26                        | 0.00065                         |
| 3                                    | 98                              | 13                        | 0.00032                         | 27                        | 0.00067                         |
| Average                              |                                 |                           | 0.00034                         |                           | 0.00064                         |

Reprogramming efficiency = number of colonies/number of cells plated.
